# Supplementary material for: Rescue of tight junctional localization of a claudin-16 mutant D97S by antimalarial medicine primaquine in Madin-Darby canine kidney cells
Source: PubMed Central journal article supplement (PMC6609605; doi:10.1038/s41598-019-46250-4), 2019-07-04
Supplement: 41598_2019_46250_MOESM1_ESM.pdf [file 41598_2019_46250_MOESM1_ESM.pdf]

Supplementary Information

**Rescue of tight junctional localization of a claudin-16 mutant D97S by antimalarial medicine primaquine in Madin-Darby canine kidney cells**

**Kana Marunaka<sup>1</sup>, Naoko Fujii<sup>1</sup>, Toru Kimura<sup>2</sup>, Takumi Furuta<sup>3</sup>,  
Hajime Hasegawa<sup>4</sup>, Toshiyuki Matsunaga<sup>1</sup>, Satoshi Endo<sup>1</sup> & Akira Ikari<sup>1,\*</sup>**

<sup>1</sup> Laboratory of Biochemistry, Department of Biopharmaceutical Sciences,  
Gifu Pharmaceutical University, Gifu, Japan

<sup>2</sup>Department of Pharmacology and Toxicology, Kyorin University School of Medicine,  
Tokyo, Japan

<sup>3</sup>Department of Pharmaceutical Chemistry, Kyoto Pharmaceutical University, Kyoto, Japan

<sup>4</sup>Saitama Medical Center, Saitama Medical University, Saitama, Japan

Running title: Primaquine restores localization of claudin-16 mutant D97S

\*Correspondence and requests for materials should be addressed to A. I.

(email: ikari@gifu-pu.ac.jp)

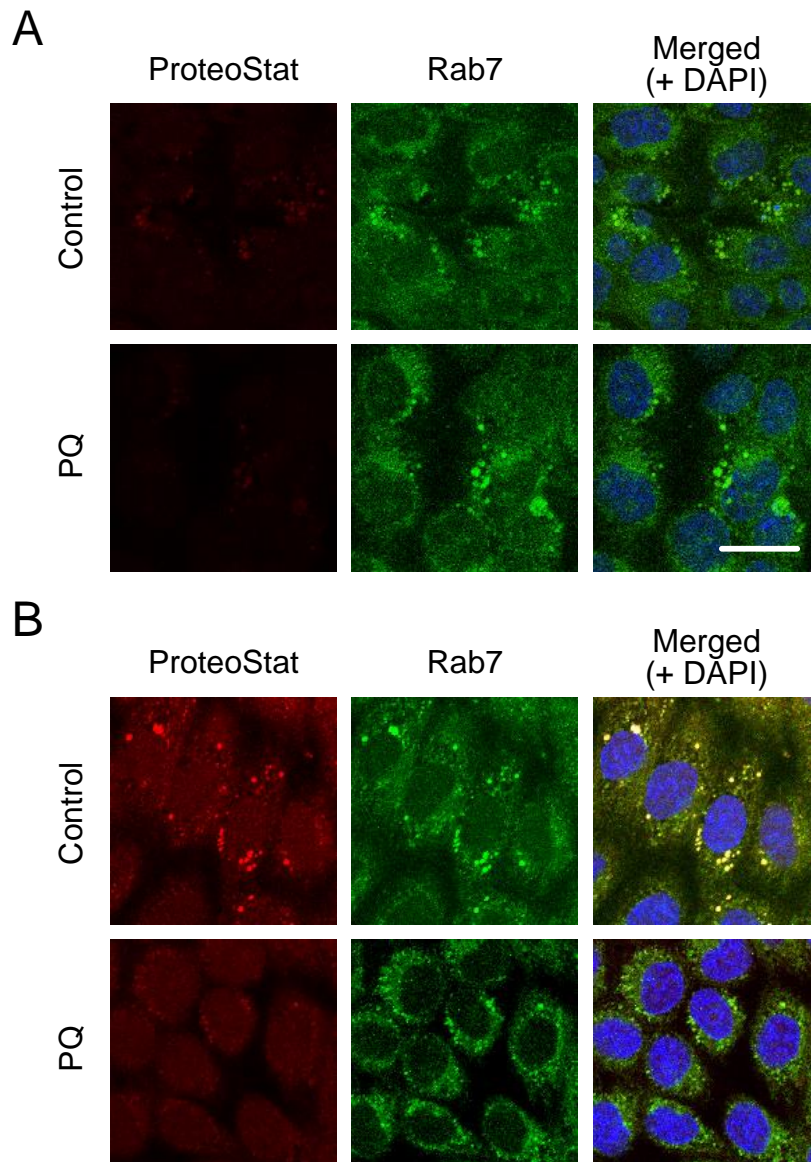

Supplementary figure S1. Localization of aggresome in the lysosome. MDCK cells expressing FLAG-tagged WT CLDN16 (A) or the D97S mutant (B) were incubated for 4 h in the absence and presence of 100  $\mu$ M primaquine (PQ), and then stained with ProteoStat (red) and anti-Rab7 antibodies (green). Merged images with DAPI are shown on the right. The scale bar represents 10  $\mu$ m.

A

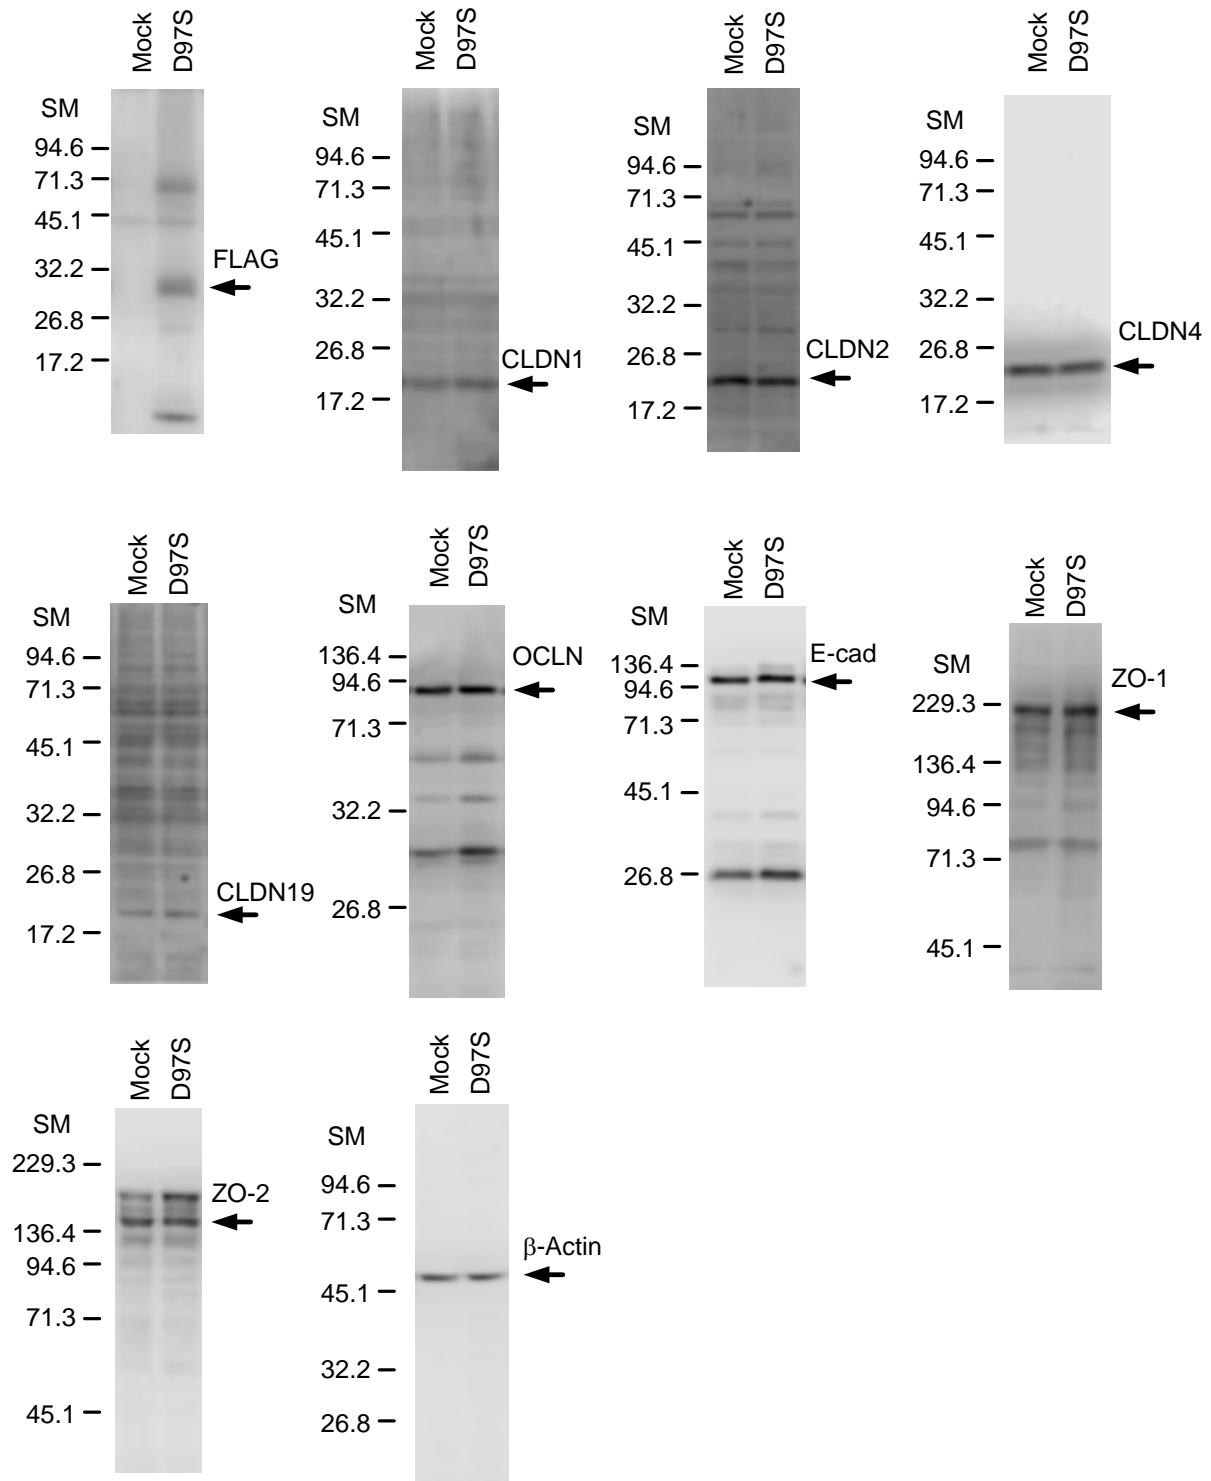

Supplementary Figure S2. Full images of the blots from figure 1A.

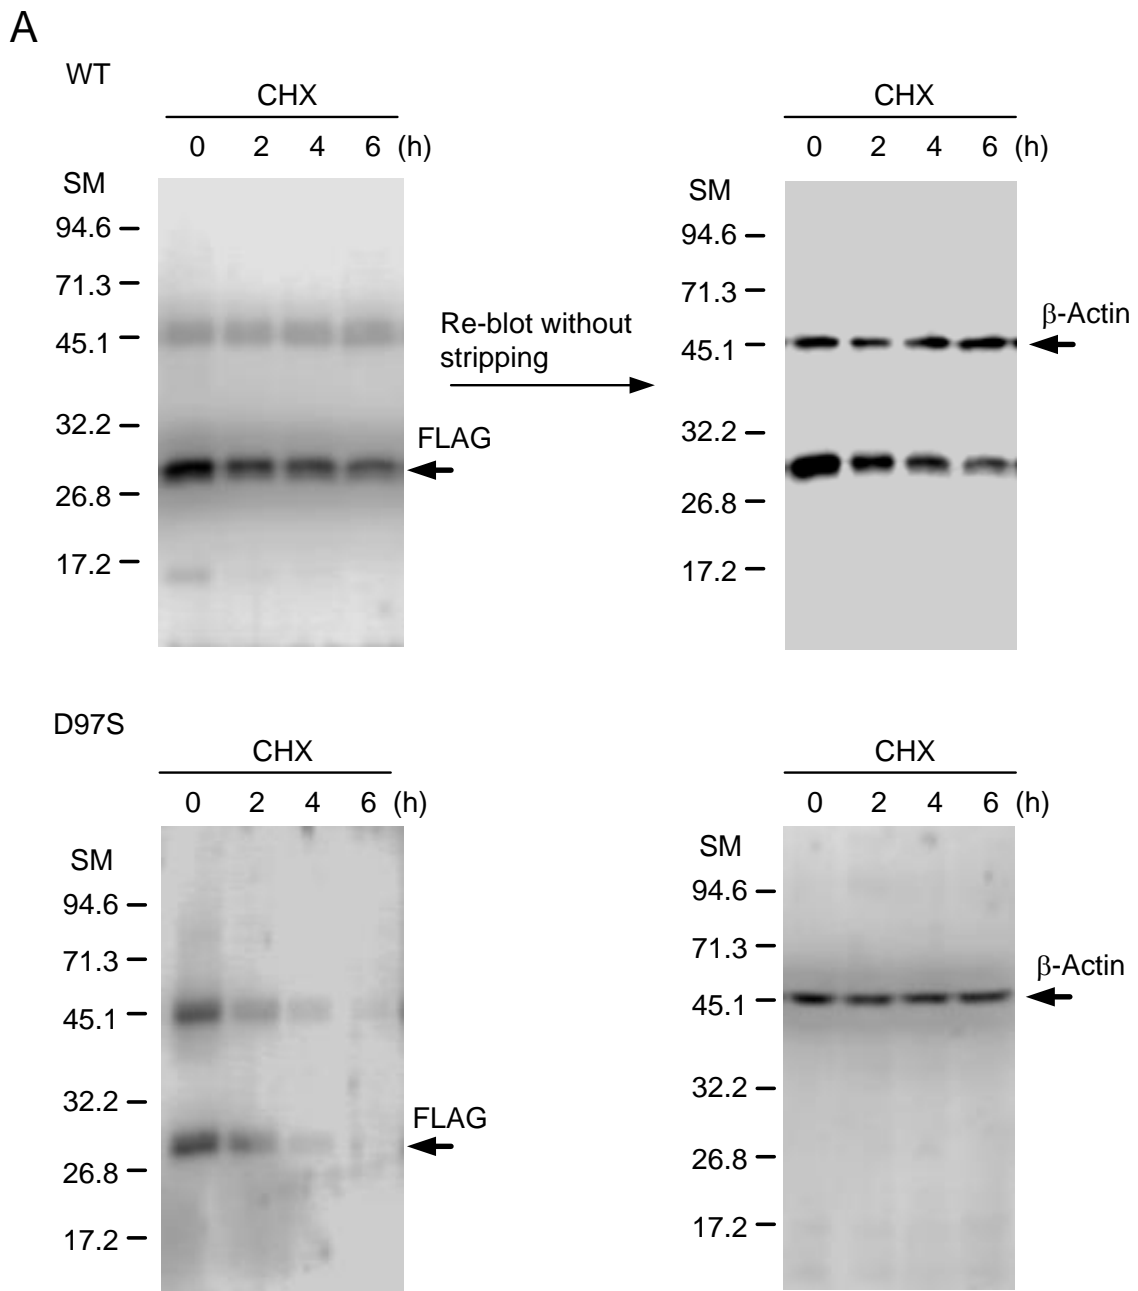

**Supplementary Figure S3.** Full images of the blots from figure 3A.

**B**

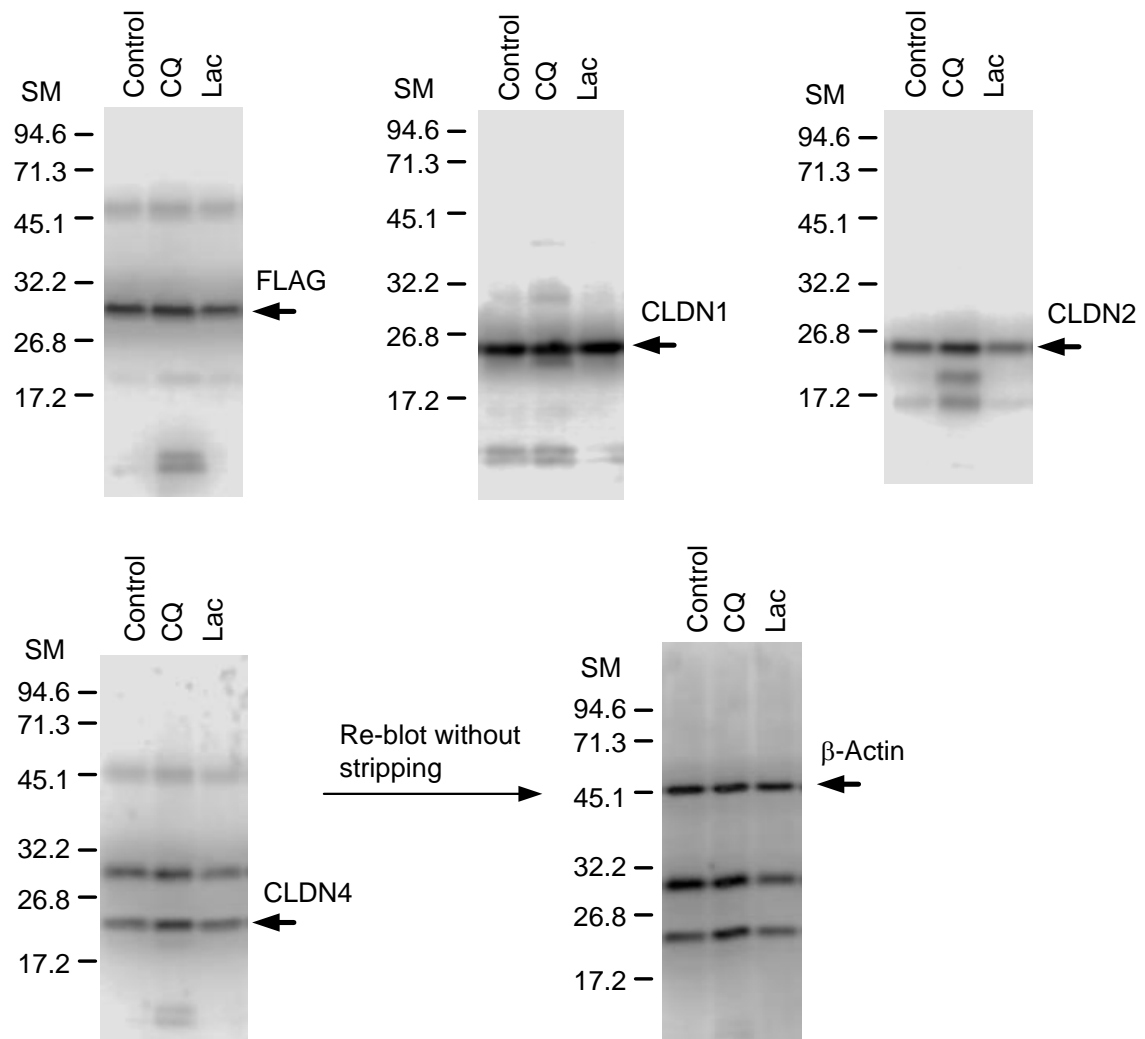

**Supplementary Figure S4.** Full images of the blots from figure 3B.

C

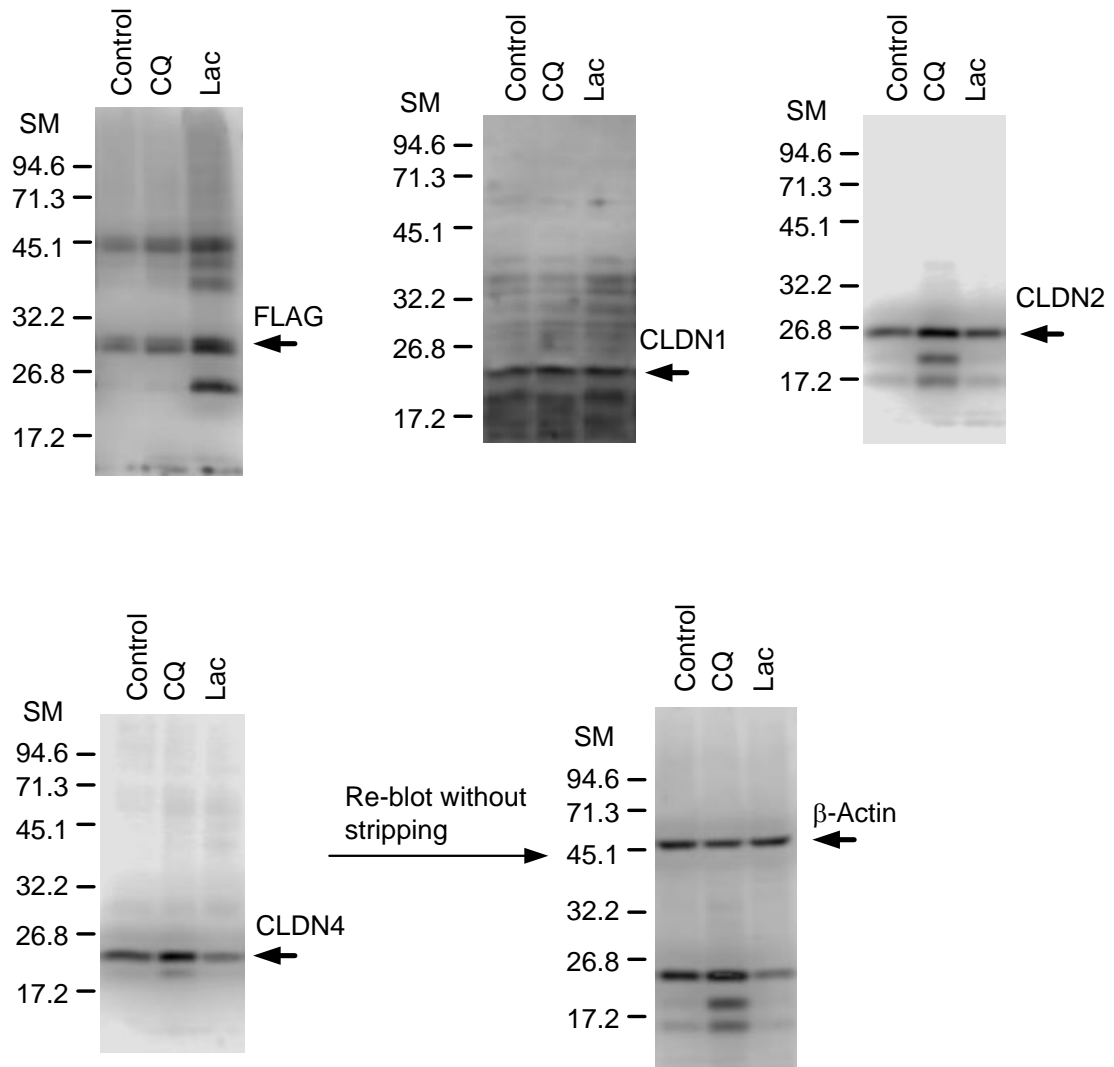

Supplementary Figure S5. Full images of the blots from figure 3C.

A

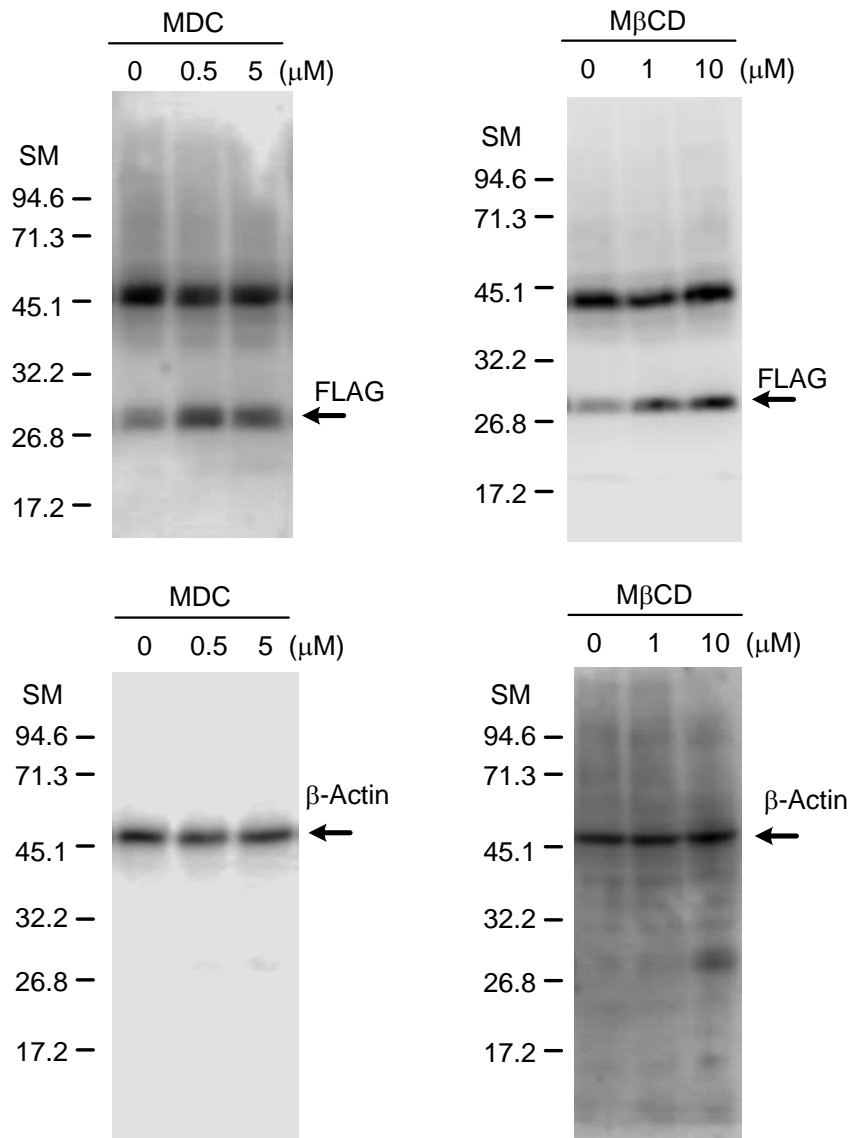

Supplementary Figure S6. Full images of the blots from figure 4A.

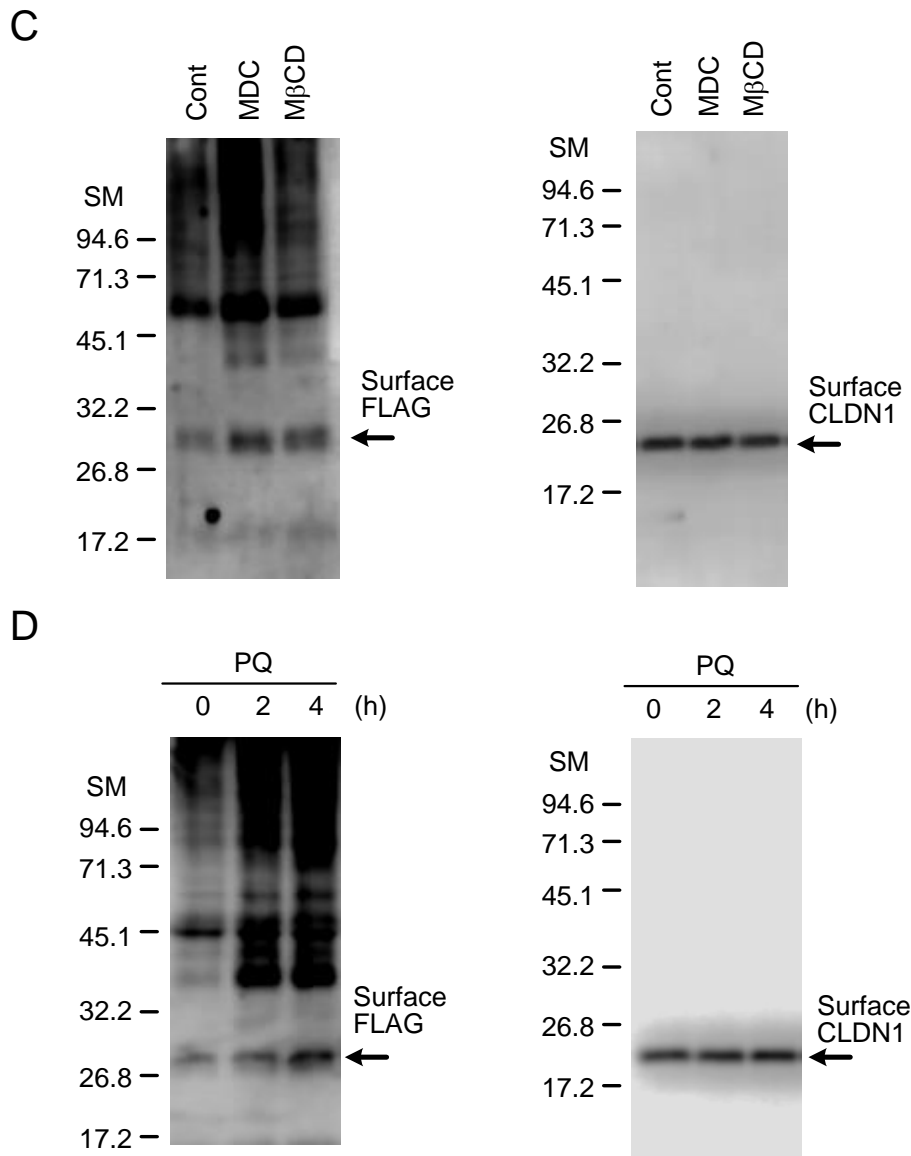

**Supplementary Figure S7.** Full images of the blots from figure 4C and 4D.



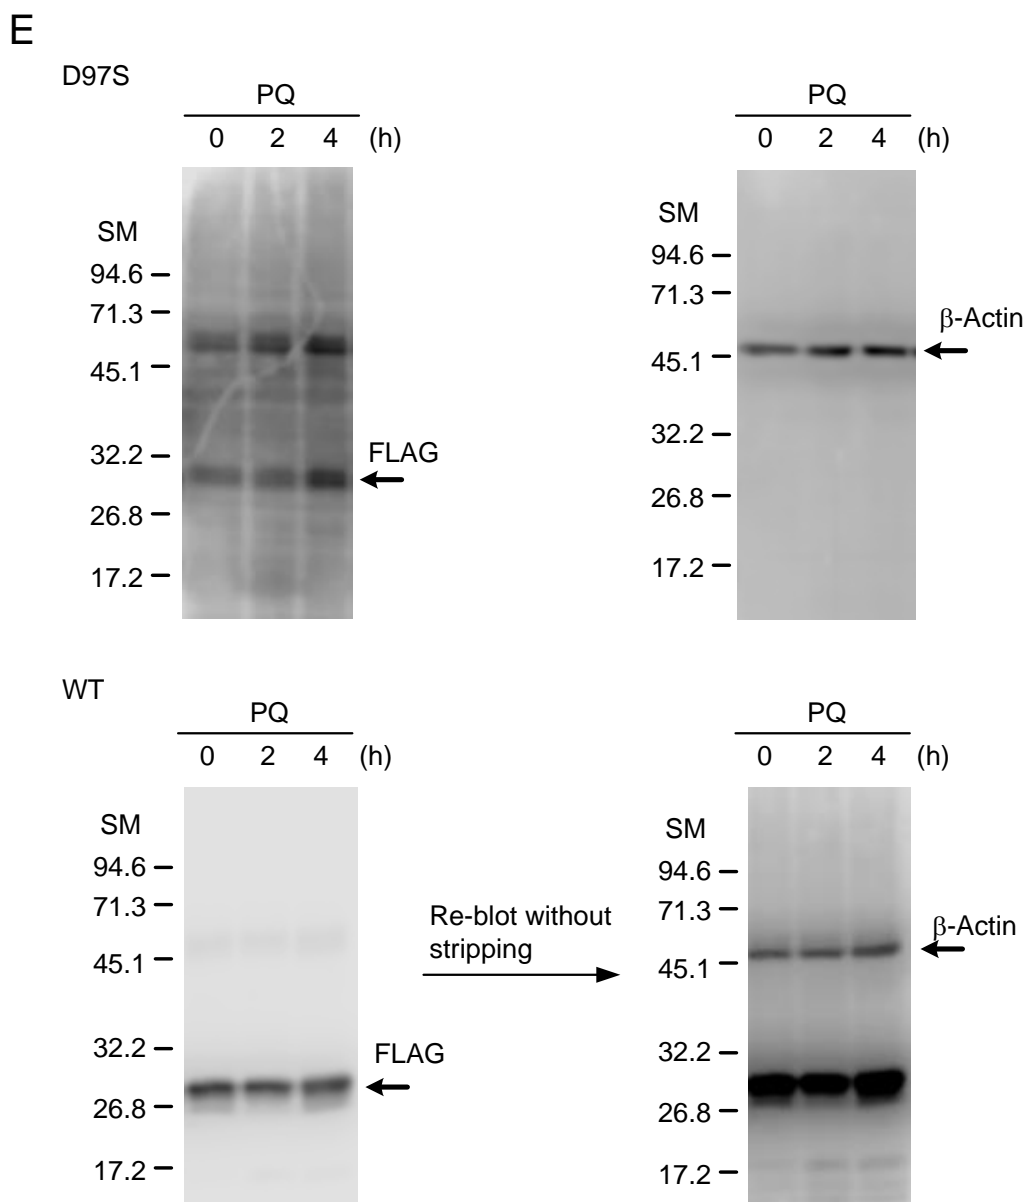

**Supplementary Figure S8.** Full images of the blots from figure 4E.

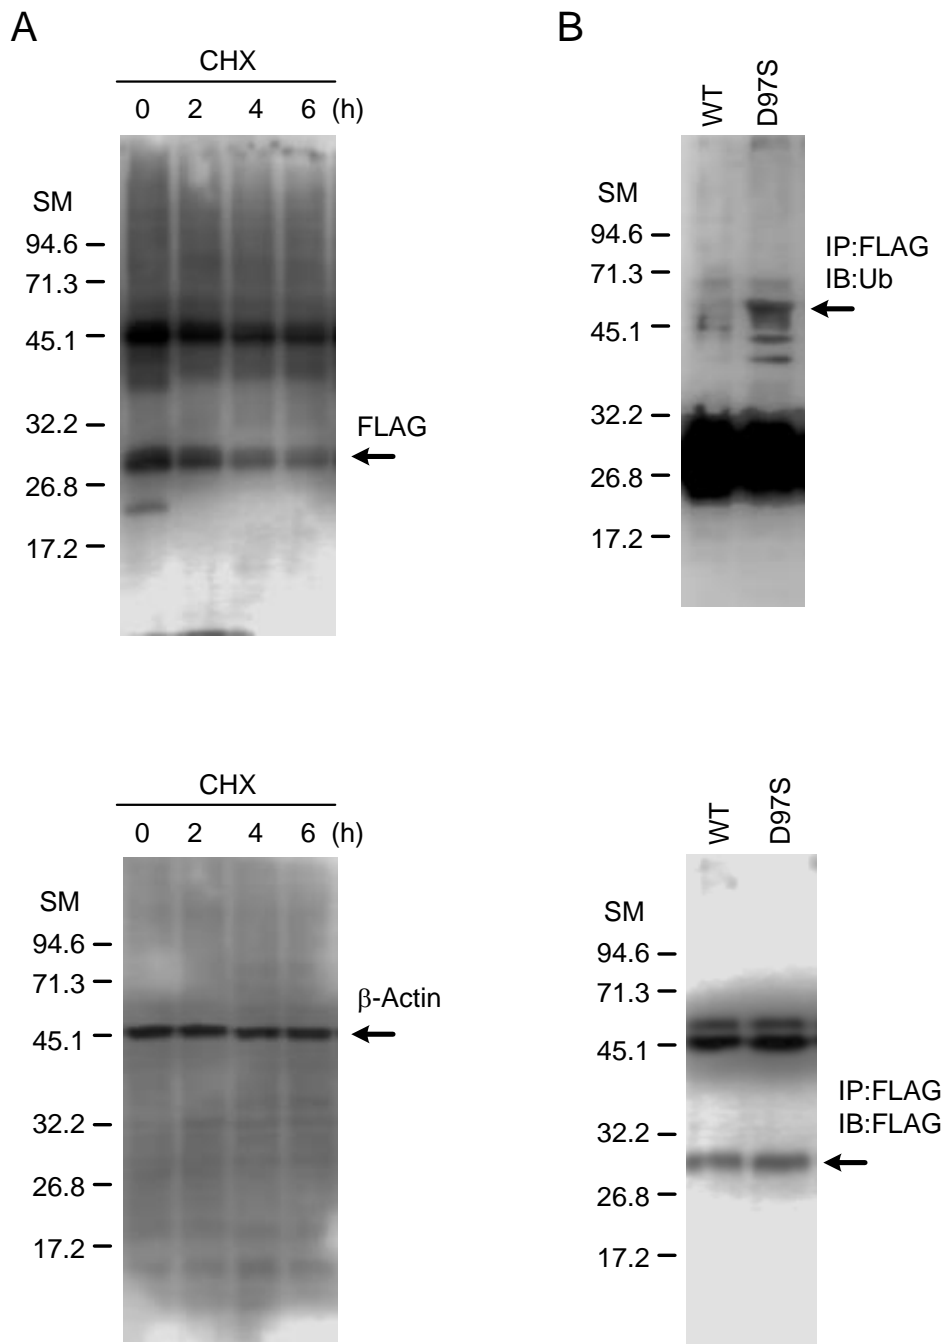

**Supplementary Figure S9.** Full images of the blots from figure 6A and 6B.

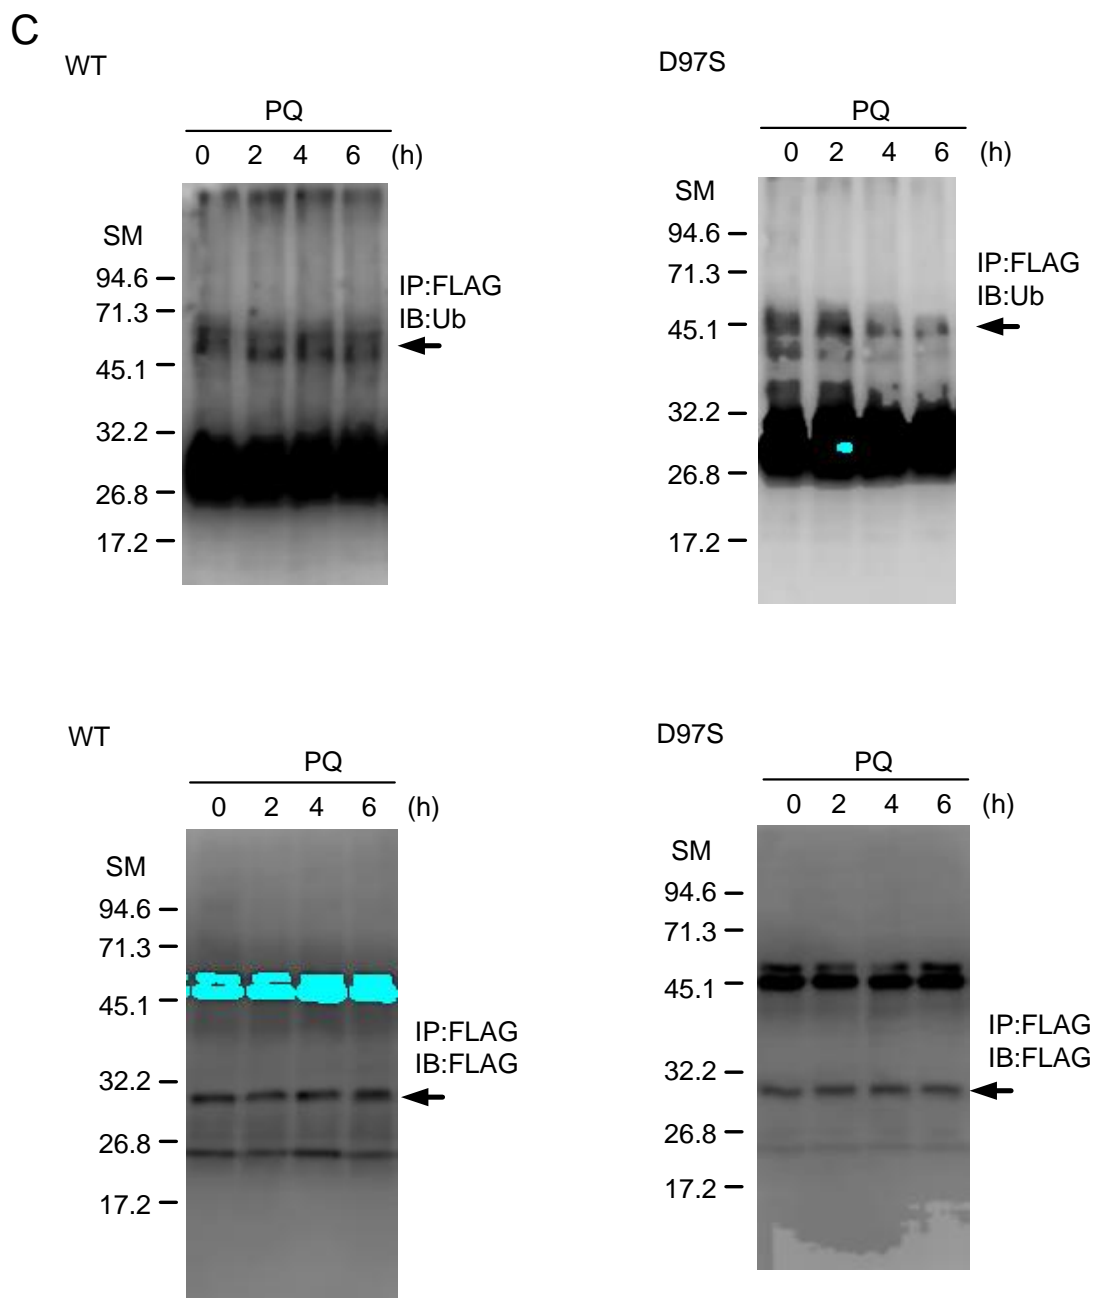

**Supplementary Figure S10.** Full images of the blots from figure 6C.

A

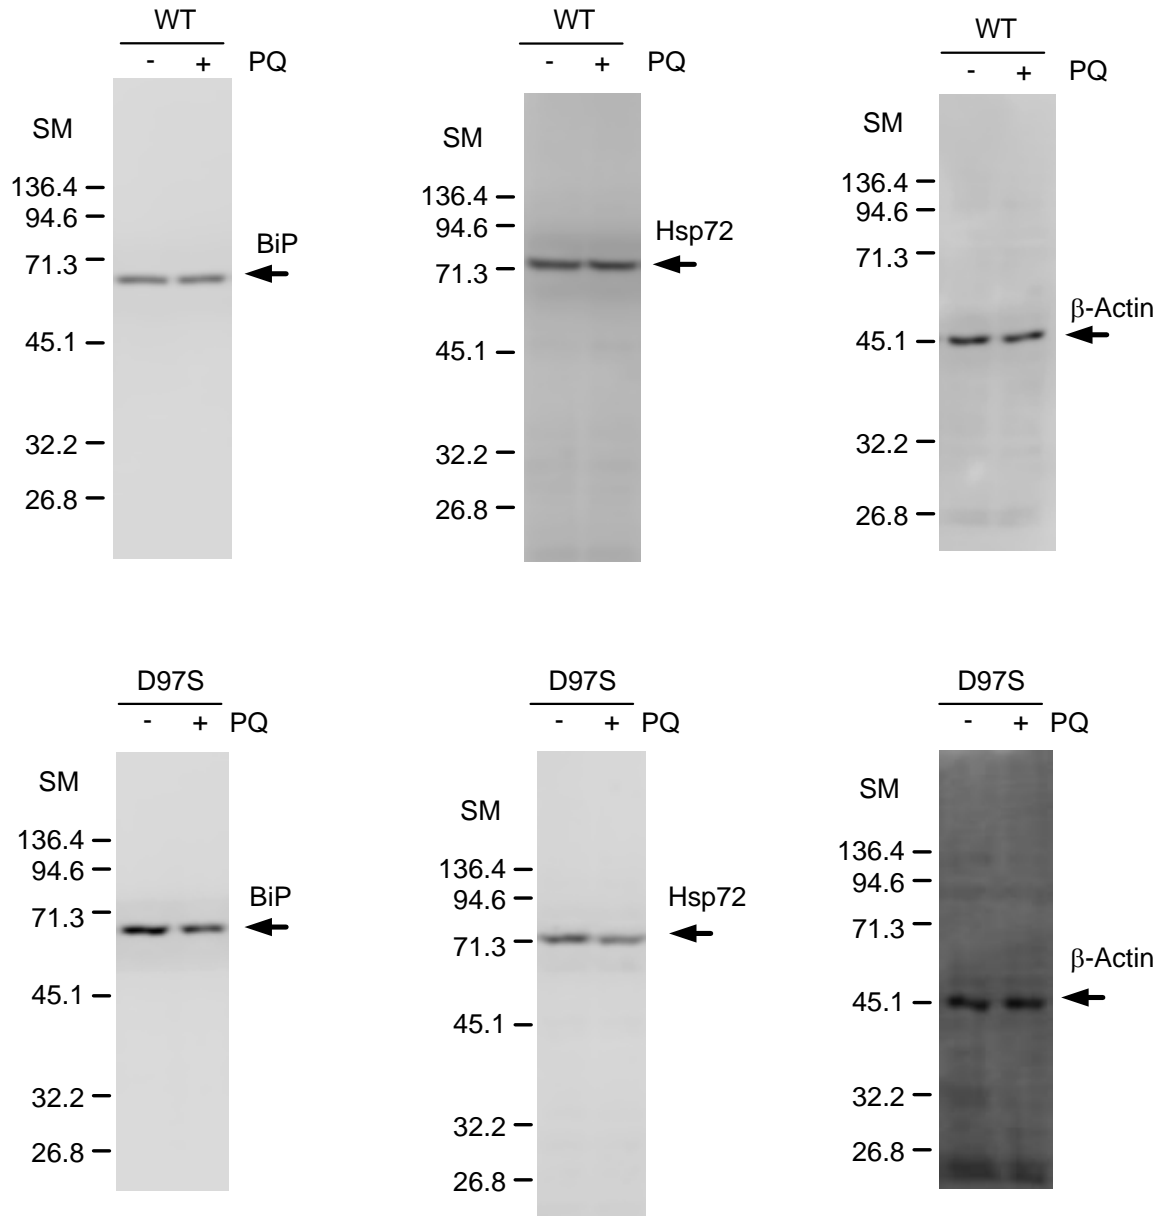

Supplementary Figure S11. Full images of the blots from figure 9A.

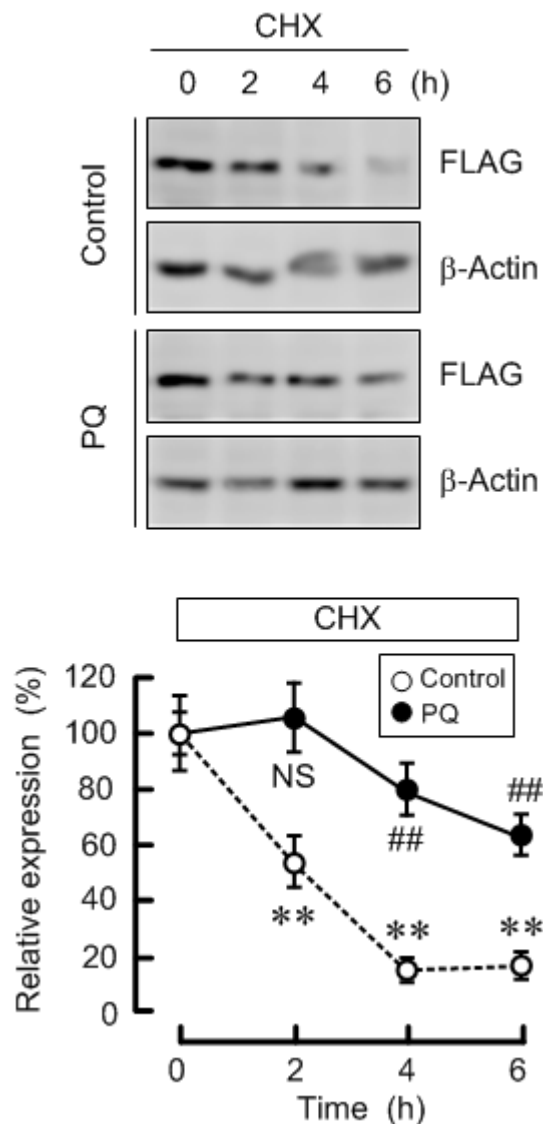

**Supplementary figure S12.** Effect of primaquine on protein stability of the R131C mutant. MDCK cells expressing the FLAG-tagged R131C mutant were treated with cycloheximide (CHX, 5  $\mu$ M) and primaquine (PQ, 100  $\mu$ M) for the indicated periods. After collecting cell lysates, the aliquots were blotted with anti-FLAG and anti- $\beta$ -actin antibodies. The band densities of proteins are represented as the percentage of the values at 0 h. The full-length blot images are shown in Supplementary Figures S13.  $n = 3$  in three independent experiments. \*\*  $P < 0.01$  compared with 0 h. ##  $P < 0.01$  and NS  $P > 0.05$  compared with -PQ.

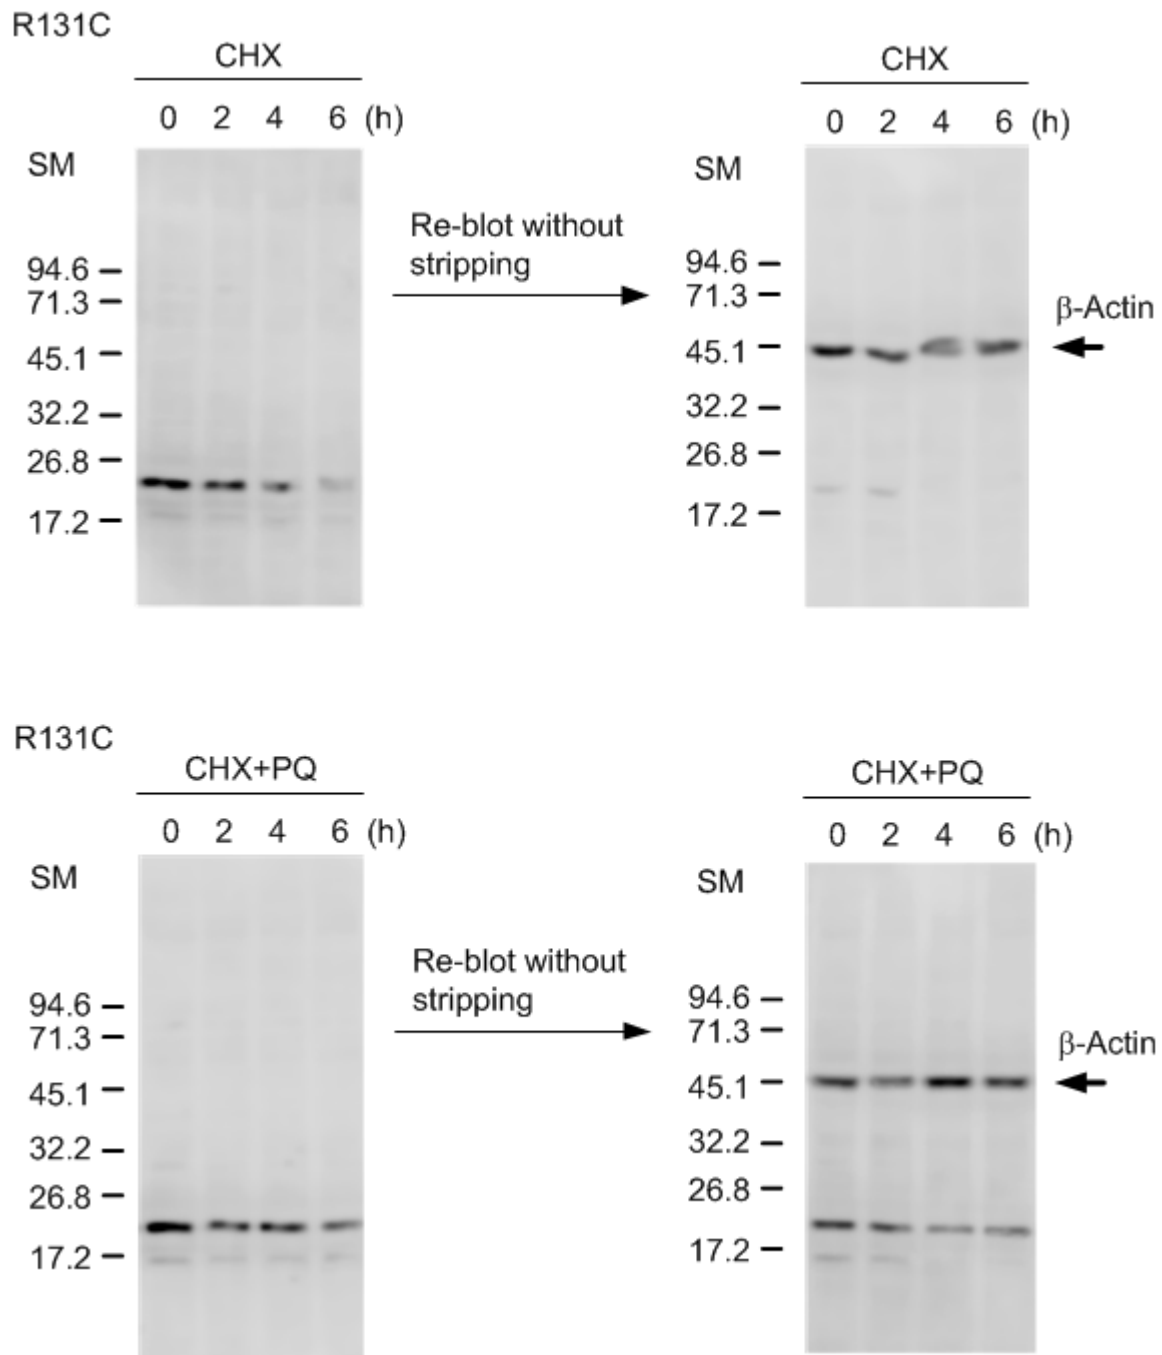

**Supplementary Figure S13.** Full images of the blots from supplementary figure S13A.

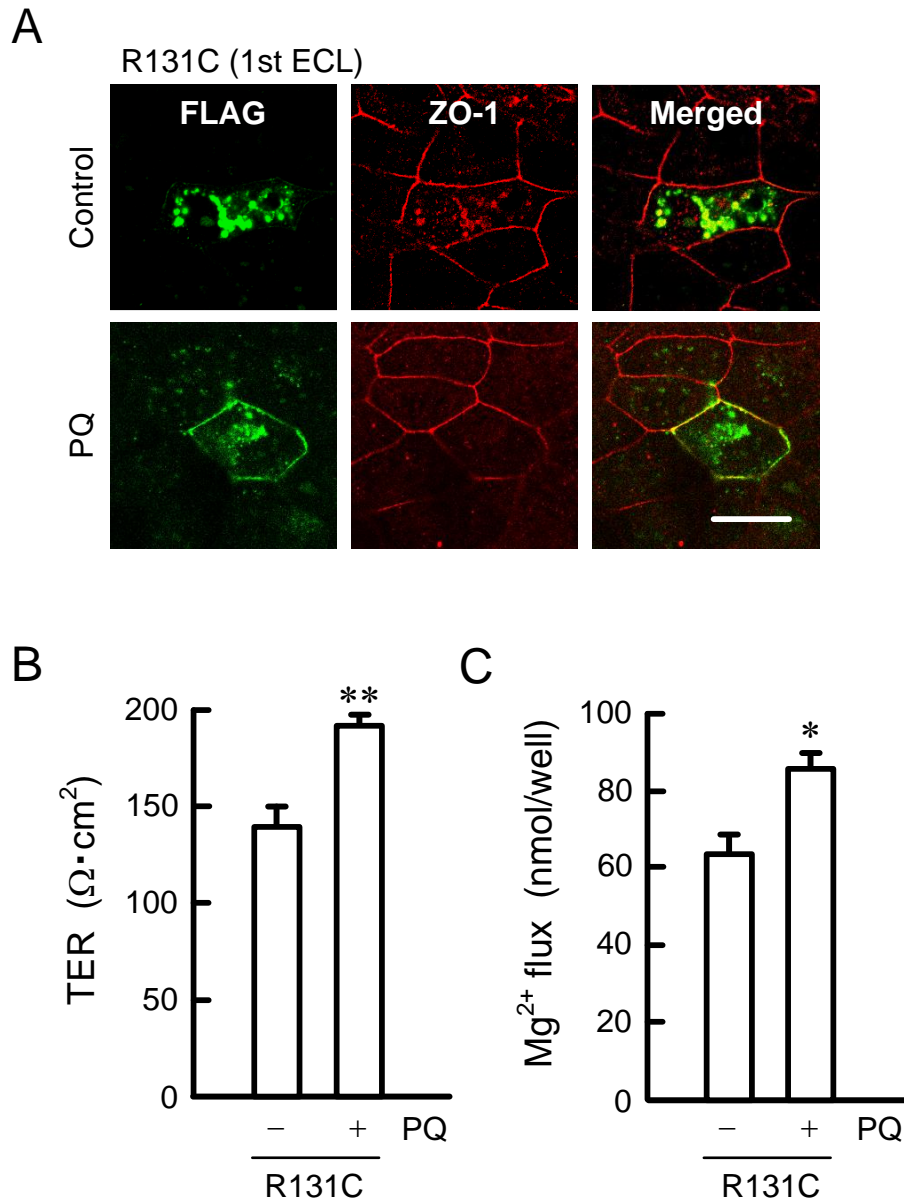

**Supplementary figure S14.** Effects of primaquine on the subcellular localization of R131C mutant and paracellular permeability. MDCK cells were transiently transfected with FLAG-tagged R131C mutant. The cells were incubated for 2 h in the absence or presence of 100  $\mu\text{M}$  primaquine (PQ), and then stained with anti-FLAG (CLDN16) and anti-ZO-1 antibodies. Merged images are shown on the right. The scale bar indicates 10  $\mu\text{m}$ . (B and C) TER was measured using a volt ohmmeter. Transepithelial  $\text{Mg}^{2+}$  permeability from the apical to basal compartment was measured using XB-1.  $n = 4$  in four independent experiments. \*\*  $P < 0.01$  and \*  $P < 0.05$  compared without -PQ.

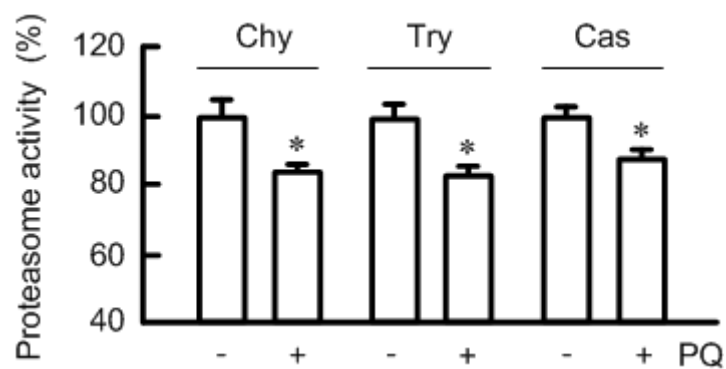

**Supplementary figure S15.** R131C mutant-expressing cells were incubated in the absence and presence of primaquine (PQ, 100  $\mu$ M) for 6 h. After collecting the cytosolic fraction using a passive buffer, chymotrypsin-like (Chy), trypsin-like (Try), and caspase-like (Cas) proteasome activities were measured using each selective substrates.  $n = 4$  in four independent experiments. \*  $P < 0.05$  compared with -PQ.
